# Supplementary material
Source: Research Square preprint supplement (doi:10.21203/rs.3.rs-10115467/v1)
Supplement: Supplementary file 1 [file 941271760f0efe578bd8dcf8.docx]

**Supplementary Material**

**Bioaccumulation of Pesticides in Marine Organisms and Associated Health Risks: The Case of Crabs from the Coastal Areas of Larache, Morocco.**

**YD1,2, AH1, AB1, IEQ3 et ME1**

Table 1 : Chromatographic conditions of the method

| **Parameter** | **Condition** |
| --- | --- |
| Sample inlet | GC |
| Injection source | GC ALS |
| Injection location | Front |
| Mass spectrometer | On |
| Run time (GC) | 20.75 min |
| Post-run time | 3 min |
| Oven temperature setpoint | On |
| Initial oven temperature | 60 °C |
| Hold time | 1 min |
| Post-run temperature | 310 °C |
| Equilibration time | 0.25 min |
| Maximum temperature | 325 °C |
| ALS injector | Front |
| Syringe size | 10 μL |
| Injection volume | 1 μL |
| Sample wash volume | 8 μL |
| Solvent wash draw speed | 300 μL min⁻¹ |
| Solvent wash dispense speed | 3000 μL min⁻¹ |
| Sample wash draw speed | 300 μL min⁻¹ |
| Sample wash dispense speed | 3000 μL min⁻¹ |
| Injection dispense speed | 300 μL min⁻¹ |

Table 2: Mass spectrometry method conditions

| **Parameter** | **Condition** |
| --- | --- |
| Ion source | EI |
| Source temperature (°C) | 280 |
| Electron energy mode | Tune settings used |
| Fixed electron energy (eV) | 70 |
| Stop mode | By chromatographic time |
| Stop time (min) | 1 |
| Solvent delay (min) | 4.5 |
| Gain usage | Yes |
| EM Saver | – |
| Advanced filtering | Yes |

Table 3: Time segments

| **Index** | **Start time (min)** | **Scan type** | **Electron energy (eV)** | **Stored data** | **Delta EMV (V)** | **Gain** |
| --- | --- | --- | --- | --- | --- | --- |
| 1 | 4.5 | dMRM | – | 20 | – | 20 |

Table 4: MRM statistics

| **Parameter** | **Value** |
| --- | --- |
| Total MRMs | 598 |
| Minimum concurrent MRMs | 3 |
| Maximum concurrent MRMs | 48 |
| Minimum scan time (group average) | 8.2 |
| Maximum scan time (group average) | 132.4 |
| Estimated cycle time | 400 |

Table 5: Correlation coefficients (R²)

| **Pesticide** | **R²** |
| --- | --- |
| Alachlor | 0.9999 |
| Bifenthrin | 0.9998 |
| Biphenyl | 0.9998 |
| Chlorobenzilate | 0.9995 |
| DDT (p,p') | 0.9999 |
| Dichlofluanid | 0.9996 |
| Metazachlor | 0.9994 |
| Methoxychlor olefin | 0.9998 |
| Propachlor | 0.9999 |
| Propisochlor | 0.9997 |

Table 6: Stability control results

| **Pesticides** | **LOQ (ppm)** | **Detector** | **Standard response (Rep 1)** | **Standard response (Rep 2)** | **% deviation per detector** | **Accepted % deviation** |
| --- | --- | --- | --- | --- | --- | --- |
| Alachlor | 0.005 | ID1 | 35877 | 34903 | 2.8 | 8.9 |
| 0.005 | ID2 | 17601 | 19320 | 8.9 | 8.9 |
| Bifenthrin | 0.005 | ID1 | 184686 | 188304 | 1.9 | 1.92 |
| 0.005 | ID2 | 68985 | 68458 | 0.8 | 1 |
| Biphenyl | 0.005 | ID1 | 234908 | 237287 | 1 | 1.48 |
| 0.005 | ID2 | 129289 | 127405 | 1.5 | 1.48 |
| Chlorobenzilate | 0.005 | ID1 | 76831 | 75834 | 1.3 | 4.55 |
| 0.005 | ID2 | 33720 | 32251 | 4.6 | 4.55 |
| DDT (p,p') | 0.005 | ID1 | 34443 | 35686 | 3.5 | 3.48 |
| 0.005 | ID2 | 11267 | 11301 | 0.3 | 0.86 |
| Dichlofluanid | 0.005 | ID1 | 52310 | 51865 | 0.9 | 6.99 |
| 0.005 | ID2 | 11858 | 11083 | 7 | 6.99 |
| Metazachlor | 0.005 | ID1 | 37849 | 37290 | 1.5 | 5.06 |
| 0.005 | ID2 | 18874 | 17965 | 5.1 | 6.73 |
| Methoxychlor olefin | 0.005 | ID1 | 114393 | 107180 | 6.7 | 6.73 |
| 0.005 | ID2 | 26466 | 25992 | 1.8 | 9.18 |
| Propachlor | 0.005 | ID1 | 12027 | 13242 | 9.2 | 9.18 |
| 0.005 | ID2 | 10316 | 10674 | 3.4 | 3.35 |
| Propichlor | 0.005 | ID1 | 38091 | 38320 | 0.6 | 0.6 |
| 0.005 | ID2 | 12670 | 13708 | 7.6 | 7.57 |

Table 7: Internal quality control results

| **Compound** | **Concentration** | **Recovery (%)** |
| --- | --- | --- |
| Alachlor | 5.11 | 102 |
| Bifenthrin | 5.13 | 103 |
| Biphenyl | 5.66 | 113 |
| Chlorobenzilate | 5.85 | 117 |
| DDT (p,p') | 5.52 | 110 |
| Dichlofluanid | 5.7 | 114 |
| Metazachlor | 5.82 | 116 |
| Methoxychlor olefin | 5.3 | 106 |
| Propachlor | 5.74 | 115 |
| Propisochlor | 5.56 | 111 |
