# Supplementary material
Source: Research Square preprint supplement (doi:10.21203/rs.3.rs-10115467/v1)
Supplement: Supplementary file 2 [file eb7fe69ae7b3e7b9720386c5.docx]

**Highlights**

- **First multi-residue pesticide study in crabs from Morocco.**
- **Co-occurrence of recent chloroacetanilides and legacy organochlorines was found.**
- **Contaminant levels ranged from 0.010 to 0.359 mg/kg, exceeding European MRLs.**
- **Non-carcinogenic risks for adults and children remain within acceptable limits.**
- **Carcinogenic risks for several pesticides exceed the 1×10⁻⁶ safety threshold.**
